# Supplementary material
Source: Research Square preprint supplement (doi:10.21203/rs.3.rs-9325137/v1)
Supplement: Supplementary file 1 [file 120b7d9f0b99418d6a450e09.xlsx]

## Sheet: Supp Table 1 Doc analysis
Comprehensive list of content after the documentary analysis
Discipline	Role	Content
Integrated Primary Care	Collaborator	Interprofessional learning
Integrated Primary Care	Collaborator	Multidisciplinary team work and genograms
Mental Health	Collaborator	The role of the psychologist in the assessment and management of psychiatric disorders
Mental Health	Collaborator	The role of the social worker in the assessment and management of psychiatric disorders
Mental Health	Collaborator	The role of the occupational therapist in the assessment and management of psychiatric disorders
Mental Health	Collaborator	Referral to another mental health care practitioner
Mental Health	Collaborator	Social and Vocational rehabilitation
Skills	Collaborator	Work with the multidsiciplinary team (MDT)
Skills	Collaborator	Share a consultation with PHC nurse
Skills	Collaborator	Write a referral letter a member of the MDT
Child Health	Communicator	Palliative Care
Child Health	Communicator	Counselling: HIV Child & Parent, Getting consent
Child Health	Communicator	Counselling: Breaking bad news (death)
Child Health	Communicator	Care of children with advanced palliative care needs
Integrated Primary Care	Communicator	Bereavement
Mental Health	Communicator	Taking a psychiatric history
Mental Health	Communicator	Psychoeducation
Mental Health	Communicator	An introduction to psychotherapy
Skills	Communicator	Take an appropriate history in a child, adult and pregnant woman
Skills	Communicator	Demonstrate effective communication skills
Skills	Communicator	Provide counselling: HIV pre- and post-test
Skills	Communicator	Provide counselling: termination of pregnancy
Skills	Communicator	Provide counselling: sexual assault
Skills	Communicator	Provide counselling: death and dying
Skills	Communicator	Provide counselling: break bad news
Skills	Communicator	Motivate behavior change
Skills	Communicator	Conduct a family conference
Skills	Communicator	Assess and counsel families and couples
Skills	Communicator	Interview a caregiver
Child Health	Health Advocate	Non Accidental Injury
Child Health	Health Advocate	Child Abuse and J88
Integrated Primary Care	Health Advocate	Context in Family Medicine
Integrated Primary Care	Health Advocate	Care plan in palliative care
Integrated Primary Care	Health Advocate	Home visits - palliative care
Integrated Primary Care	Health Advocate	Community engagement
Integrated Primary Care	Health Advocate	Cultural factors and their role in patient management
Mental Health	Health Advocate	Advocacy and Support Groups
Mental Health	Health Advocate	Support Systems for Depressive Disorders
Mental Health	Health Advocate	Capacity for informed consent
Mental Health	Health Advocate	Homlessness
Obstetrics and Gynaecology	Health Advocate	Sexual abuse/domestic violence
Skills	Health Advocate	Use a genogram and ecomap
Skills	Health Advocate	Use a problem-oriented medical record
Child Health	Healthcare practitioner	Maternal Breast Feeding Health Care Initiative (MBFHI) / KMC
Child Health	Healthcare practitioner	Feeding and Nutrition
Child Health	Healthcare practitioner	Breastfeeding
Child Health	Healthcare practitioner	Approach to Protein Energy Malnutrition/ Failure to thrive
Child Health	Healthcare practitioner	An Approach to gastroenteritis and dehydration
Child Health	Healthcare practitioner	Approach to Renal Exam and Renal Failure
Child Health	Healthcare practitioner	Approach to Acute Lower Respiratory Tract Infections
Child Health	Healthcare practitioner	Approach to Chronic Lung Disease
Child Health	Healthcare practitioner	Common Genetic conditions
Child Health	Healthcare practitioner	CNS/ Normal Development/ Milestones
Child Health	Healthcare practitioner	Approach to a floppy Infant
Child Health	Healthcare practitioner	Meningitis
Child Health	Healthcare practitioner	An approach to a bleeding child
Child Health	Healthcare practitioner	Anaemia/ Lymphadenopathy
Child Health	Healthcare practitioner	Approach to CVS Examination and CCF
Child Health	Healthcare practitioner	Abdominal Examination and approach to Jaundice in children
Child Health	Healthcare practitioner	Tuberculosis
Child Health	Healthcare practitioner	HIV infection in children
Child Health	Healthcare practitioner	Common Paediatrics Problems
Child Health	Healthcare practitioner	Allergies in children
Child Health	Healthcare practitioner	Paediatric Cardiac Disease
Child Health	Healthcare practitioner	Epilepsy in children
Child Health	Healthcare practitioner	Hepatic diseases
Child Health	Healthcare practitioner	Renal diseases in children
Child Health	Healthcare practitioner	Recognition and management of common skin conditions
Child Health	Healthcare practitioner	The road to health book
Child Health	Healthcare practitioner	Extended Programme of Immunization
Child Health	Healthcare practitioner	Recognition of the malnourished and obese child
Child Health	Healthcare practitioner	Integrated Management of Childhood Illnesses
Child Health	Healthcare practitioner	Examination skills of all systems
Child Health	Healthcare practitioner	General and Acute Malnutrition
Child Health	Healthcare practitioner	Integrated Management & Assessement of Malnutrition (IMAM)
Child Health	Healthcare practitioner	Human Immunodeficiency Virus: Epidemiology,Diagnosis and Treatment
Child Health	Healthcare practitioner	Epilepsy in childhood
Child Health	Healthcare practitioner	The Blue Child: Cardiac or Respiratory?
Child Health	Healthcare practitioner	Tuberculosis: Assessment, Treatment, Prophylaxis
Child Health	Healthcare practitioner	Neonatal Resuscitation Skills & Scenarios
Child Health	Healthcare practitioner	The septic neonate
Child Health	Healthcare practitioner	Congenital Abnormalities and and approach to the Dysmorphic Baby
Child Health	Healthcare practitioner	Respiratory Distress in the Neonate
Child Health	Healthcare practitioner	Necrotising Enterocolitis & Abdominal Pathology in the neonate
Child Health	Healthcare practitioner	Care of children with common cardiac conditions
Child Health	Healthcare practitioner	Care of children with common urogenital illnesses
Child Health	Healthcare practitioner	Care of children with common neurological illnesses
Child Health	Healthcare practitioner	Care of children with common respiratory illnesses
Child Health	Healthcare practitioner	Care of children with common gastrointestinal illnesses
Child Health	Healthcare practitioner	Care of children with common metabolic conditions
Child Health	Healthcare practitioner	Recognition and management of common infectious conditions
Child Health	Healthcare practitioner	Recognition and management of common uncomplicated causes of fever
Child Health	Healthcare practitioner	Recognition and management of common ENT, eye and mouth conditions
Child Health	Healthcare practitioner	Recognition and management of simple feeding difficulties
Child Health	Healthcare practitioner	Recognition and management of allergic conditions
Child Health	Healthcare practitioner	Recognition and management of respiratory distress syndrome
Child Health	Healthcare practitioner	Recognition and management of hypoxic ischemic encephalopathy
Child Health	Healthcare practitioner	Recognition and management of neonatal jaundice
Child Health	Healthcare practitioner	Recognition and emergency management of a neonate with congenital heart disease
Child Health	Healthcare practitioner	Management of acute respiratory distress and failure
Child Health	Healthcare practitioner	Management of shock and dehydration
Child Health	Healthcare practitioner	Management of diabetic ketoacidosis
Child Health	Healthcare practitioner	Management of status epilepticus
Child Health	Healthcare practitioner	Management of acute cardiac failure
Child Health	Healthcare practitioner	Management of acute haematological crisis
Child Health	Healthcare practitioner	Care of children with musculoskeletal conditions
Child Health	Healthcare practitioner	Care of children with advanced neurological conditions
Child Health	Healthcare practitioner	Care of children with advanced gastrointestinal conditions
Child Health	Healthcare practitioner	Care of children with advanced pulmonological conditions
Child Health	Healthcare practitioner	Care of children with advanced renal conditions
Child Health	Healthcare practitioner	Care of children with advanced neonatal conditions
Child Health	Healthcare practitioner	Care of children with advanced cardiovascular conditions
Child Health	Healthcare practitioner	Care of children with advanced haematological conditions
Child Health	Healthcare practitioner	Paediatric radiology
Child Health	Healthcare practitioner	Paediatric resuscitation
Child Health	Healthcare practitioner	Undertaking and interpreting stool, urine and sputum microscopy and smear
Child Health	Healthcare practitioner	Basic pharmacology related to dosing of children
Child Health	Healthcare practitioner	Undertaking basic technique of blood-letting, tuberculin skin testing and performing a lumbar puncture
Child Health	Healthcare practitioner	Undertaking a comprehensive clerking of a paediatric patient
Child Health	Healthcare practitioner	Genetics
Child Health	Healthcare practitioner	Downs Syndrome
Child Health	Healthcare practitioner	Pain Control & Pharmacology
Integrated Primary Care	Healthcare practitioner	Approach to the acute red eye
Integrated Primary Care	Healthcare practitioner	Approach to sudden loss of vision
Integrated Primary Care	Healthcare practitioner	Approach to slow loss of vision
Integrated Primary Care	Healthcare practitioner	Approach to abnormal ocular appearance
Integrated Primary Care	Healthcare practitioner	Approach to ocular trauma
Integrated Primary Care	Healthcare practitioner	Approach to HIV and the eye
Integrated Primary Care	Healthcare practitioner	Examination of a pregnant patient
Integrated Primary Care	Healthcare practitioner	Basic Antenatal Care in primary care
Integrated Primary Care	Healthcare practitioner	ENT Infections
Integrated Primary Care	Healthcare practitioner	Epistaxis
Integrated Primary Care	Healthcare practitioner	Nasal Obstruction
Integrated Primary Care	Healthcare practitioner	Oral Cavity conditions
Integrated Primary Care	Healthcare practitioner	ENT Anatomy and Physiology
Integrated Primary Care	Healthcare practitioner	Nose/ Oral Cavity anatomy & examination
Integrated Primary Care	Healthcare practitioner	Ear anatomy & examination
Integrated Primary Care	Healthcare practitioner	Video Otoscopy
Integrated Primary Care	Healthcare practitioner	Airway Management
Integrated Primary Care	Healthcare practitioner	Causes of abdominal pain + referred pain
Integrated Primary Care	Healthcare practitioner	The acute abdomen
Integrated Primary Care	Healthcare practitioner	Wound management (incl. dressings)
Integrated Primary Care	Healthcare practitioner	Breast examination & Approach to breast lump
Integrated Primary Care	Healthcare practitioner	Vascular: History taking/ examination / peripheral vascular dx
Integrated Primary Care	Healthcare practitioner	Infections and abscesses
Integrated Primary Care	Healthcare practitioner	Thyroid conditions
Integrated Primary Care	Healthcare practitioner	An approach to a patient with HIV
Integrated Primary Care	Healthcare practitioner	Fundoscopy -slide show
Integrated Primary Care	Healthcare practitioner	PMTCT
Integrated Primary Care	Healthcare practitioner	Human sexuality
Integrated Primary Care	Healthcare practitioner	Primary emergency care
Integrated Primary Care	Healthcare practitioner	ECG and data interpretation
Integrated Primary Care	Healthcare practitioner	Approach to trauma patient
Integrated Primary Care	Healthcare practitioner	Approach to medical emergencies and the undifferentiated patient
Integrated Primary Care	Healthcare practitioner	Approach to paediatric emergencies
Integrated Primary Care	Healthcare practitioner	Palliative care emergencies
Integrated Primary Care	Healthcare practitioner	Palliative care - an introduction
Integrated Primary Care	Healthcare practitioner	Palliative care pharmacology
Integrated Primary Care	Healthcare practitioner	Pain management in palliative care
Integrated Primary Care	Healthcare practitioner	Breathlessness in palliative care
Internal Medicine	Healthcare practitioner	Introduction to common disorders of the renal system
Internal Medicine	Healthcare practitioner	Hypertension
Internal Medicine	Healthcare practitioner	Valvular Heart Disease
Internal Medicine	Healthcare practitioner	Pericardial Disease
Internal Medicine	Healthcare practitioner	Ischaemic Heart Disease
Internal Medicine	Healthcare practitioner	Infective Endocarditis
Internal Medicine	Healthcare practitioner	Congestive Cardiac Failure
Internal Medicine	Healthcare practitioner	Cardiogenic Shock
Internal Medicine	Healthcare practitioner	Pulmonary Hypertension
Internal Medicine	Healthcare practitioner	Cardiomyopathy
Internal Medicine	Healthcare practitioner	Syncope
Internal Medicine	Healthcare practitioner	Pulmonary Embolus
Internal Medicine	Healthcare practitioner	Ischaemic and Non Ischaemic Chest Pain
Internal Medicine	Healthcare practitioner	Psoriasis and Papulosquamous Disorders
Internal Medicine	Healthcare practitioner	Acne and Eczema
Internal Medicine	Healthcare practitioner	Urticaria and Drug Eruptions
Internal Medicine	Healthcare practitioner	HIV and Skin Disorders
Internal Medicine	Healthcare practitioner	Cutaneous Manifestations of Systemic Disease
Internal Medicine	Healthcare practitioner	Pituitary disorders
Internal Medicine	Healthcare practitioner	Parathyroid disorders
Internal Medicine	Healthcare practitioner	Adrenal gland disorders
Internal Medicine	Healthcare practitioner	Thyroid gland disorders
Internal Medicine	Healthcare practitioner	Diabetes mellitus
Internal Medicine	Healthcare practitioner	Hypercholesterolaemia
Internal Medicine	Healthcare practitioner	Patient management in the health care team
Internal Medicine	Healthcare practitioner	Acute Liver Disease
Internal Medicine	Healthcare practitioner	Chronic pancreatitis
Internal Medicine	Healthcare practitioner	Cirrhosis & liver failure
Internal Medicine	Healthcare practitioner	Gastro-oesophageal reflux disease and peptic ulcer disease
Internal Medicine	Healthcare practitioner	Acute, chronic & HIV- related diarrhoea
Internal Medicine	Healthcare practitioner	Inflammatory bowel disease
Internal Medicine	Healthcare practitioner	Abdominal tuberculosis
Internal Medicine	Healthcare practitioner	Irritable bowel syndrome
Internal Medicine	Healthcare practitioner	GIT and liver anatomy and physiology
Internal Medicine	Healthcare practitioner	Principles of geriatric medicine
Internal Medicine	Healthcare practitioner	Urinary Incontinence in the elderly
Internal Medicine	Healthcare practitioner	Falls in the elderly
Internal Medicine	Healthcare practitioner	Infections in the elderly
Internal Medicine	Healthcare practitioner	Dementia
Internal Medicine	Healthcare practitioner	Frailty
Internal Medicine	Healthcare practitioner	Confusion in the elderly
Internal Medicine	Healthcare practitioner	Comprehensive geriatric assessment
Internal Medicine	Healthcare practitioner	Osteoporosis
Internal Medicine	Healthcare practitioner	Bleeding disorders
Internal Medicine	Healthcare practitioner	Thrombocytopaenia
Internal Medicine	Healthcare practitioner	Anaemia
Internal Medicine	Healthcare practitioner	Leukemia
Internal Medicine	Healthcare practitioner	Leucocytosis
Internal Medicine	Healthcare practitioner	Pancytopaenia
Internal Medicine	Healthcare practitioner	Idiopathic Thrombocytopaenic Purpura
Internal Medicine	Healthcare practitioner	Principles of haematology
Internal Medicine	Healthcare practitioner	Essential skills in haematology
Internal Medicine	Healthcare practitioner	Lymphoma
Internal Medicine	Healthcare practitioner	Polycythaemia
Internal Medicine	Healthcare practitioner	Myelofibrosis
Internal Medicine	Healthcare practitioner	Haemophilia
Internal Medicine	Healthcare practitioner	Principles of infectious disease
Internal Medicine	Healthcare practitioner	Human Immunodeficiency Virus Infection
Internal Medicine	Healthcare practitioner	Immunisation/ Vaccination in Adults
Internal Medicine	Healthcare practitioner	Upper respiratory tract infections
Internal Medicine	Healthcare practitioner	Lower respiratory tract infections
Internal Medicine	Healthcare practitioner	Lower urinary tract infections
Internal Medicine	Healthcare practitioner	Acute pyelonephritis
Internal Medicine	Healthcare practitioner	Septicaemia
Internal Medicine	Healthcare practitioner	Acute and chronic meningitis
Internal Medicine	Healthcare practitioner	Acute non-specific viremia
Internal Medicine	Healthcare practitioner	Influenza
Internal Medicine	Healthcare practitioner	Colds
Internal Medicine	Healthcare practitioner	Herpes simplex virus
Internal Medicine	Healthcare practitioner	Herpes varicella- zoster
Internal Medicine	Healthcare practitioner	Ebstein - barr virus
Internal Medicine	Healthcare practitioner	Cellulitis
Internal Medicine	Healthcare practitioner	Soft- tissue infections
Internal Medicine	Healthcare practitioner	Thrombophlebitis
Internal Medicine	Healthcare practitioner	Pulmonary tuberculosis
Internal Medicine	Healthcare practitioner	Extrapulmonary tuberculosis
Internal Medicine	Healthcare practitioner	Malaria
Internal Medicine	Healthcare practitioner	Measles, mumps and rubella
Internal Medicine	Healthcare practitioner	Typhoid
Internal Medicine	Healthcare practitioner	Amoebiasis
Internal Medicine	Healthcare practitioner	Pyrexia of unknown origin
Internal Medicine	Healthcare practitioner	Characteristics of autoimmune and connective tissue disease
Internal Medicine	Healthcare practitioner	Gout
Internal Medicine	Healthcare practitioner	Approach to joint pain
Internal Medicine	Healthcare practitioner	Inflammatory arthritis
Internal Medicine	Healthcare practitioner	Osteoarthritis
Internal Medicine	Healthcare practitioner	Neck and back pain
Internal Medicine	Healthcare practitioner	Septic arthritis
Internal Medicine	Healthcare practitioner	Asthma
Internal Medicine	Healthcare practitioner	Chronic obstructive pulmonary disease
Internal Medicine	Healthcare practitioner	Approach to respiratory distress
Internal Medicine	Healthcare practitioner	Principles of pulmonology
Internal Medicine	Healthcare practitioner	Breathlessness
Internal Medicine	Healthcare practitioner	Cough
Internal Medicine	Healthcare practitioner	Pleural effusion
Internal Medicine	Healthcare practitioner	Cor pulmonale
Internal Medicine	Healthcare practitioner	SVC obstruction
Internal Medicine	Healthcare practitioner	Pneumonia
Internal Medicine	Healthcare practitioner	Lung abscess and empyema
Internal Medicine	Healthcare practitioner	Pulmonary tuberculosis
Internal Medicine	Healthcare practitioner	Respiratory failure
Internal Medicine	Healthcare practitioner	Fibrotic lung disease
Internal Medicine	Healthcare practitioner	Bronchiectasis
Internal Medicine	Healthcare practitioner	Bronchial carcinoma
Internal Medicine	Healthcare practitioner	Sarcoidosis
Internal Medicine	Healthcare practitioner	Mesothelioma
Internal Medicine	Healthcare practitioner	Occupational lung disease
Internal Medicine	Healthcare practitioner	Interstitial lung disease
Internal Medicine	Healthcare practitioner	HIV and the lungs
Internal Medicine	Healthcare practitioner	Acute kidney injury
Internal Medicine	Healthcare practitioner	Drugs and the kidney
Internal Medicine	Healthcare practitioner	Urinary tract infections
Internal Medicine	Healthcare practitioner	HIV and the Kidney
Internal Medicine	Healthcare practitioner	Chronic kidney disease
Internal Medicine	Healthcare practitioner	Hypertension and diabetes mellitus in kidney disease
Internal Medicine	Healthcare practitioner	Glomerular disease
Internal Medicine	Healthcare practitioner	Neurosyphilis
Internal Medicine	Healthcare practitioner	Neurocysticercosis
Internal Medicine	Healthcare practitioner	CNS manifestations of HIV infection
Internal Medicine	Healthcare practitioner	Stroke
Internal Medicine	Healthcare practitioner	Epilepsy
Internal Medicine	Healthcare practitioner	Headache
Internal Medicine	Healthcare practitioner	Paraparesis
Internal Medicine	Healthcare practitioner	Cerebellar disease
Internal Medicine	Healthcare practitioner	Essential skills in neurology
Internal Medicine	Healthcare practitioner	Peripheral neuropathy
Internal Medicine	Healthcare practitioner	Coma
Internal Medicine	Healthcare practitioner	Parkinson's Disease
Internal Medicine	Healthcare practitioner	Raised Intracranial Pressure
Internal Medicine	Healthcare practitioner	Lower Motor Neurone Weakness
Internal Medicine	Healthcare practitioner	Nerve Entrapment Syndromes
Internal Medicine	Healthcare practitioner	Muscular Weakness
Internal Medicine	Healthcare practitioner	Cerebral Toxoplasmosis
Internal Medicine	Healthcare practitioner	Wernicke's Encephalopathy
Internal Medicine	Healthcare practitioner	Subarachnoid Hemorrhage
Internal Medicine	Healthcare practitioner	Guillaine - Barre Syndrome
Internal Medicine	Healthcare practitioner	Rabies
Internal Medicine	Healthcare practitioner	Poliomyelitis
Internal Medicine	Healthcare practitioner	Motor Neurone Disease
Internal Medicine	Healthcare practitioner	Muscular Dystrophy
Internal Medicine	Healthcare practitioner	Multiple Sclerosis
Internal Medicine	Healthcare practitioner	Movement Disorders
Internal Medicine	Healthcare practitioner	Venous ThromboEmbolic disease, DVT
Internal Medicine	Healthcare practitioner	Pulmonary embolism
Internal Medicine	Healthcare practitioner	Drugs and the kidney
Mental Health	Healthcare practitioner	Signs and symptoms of mental illness
Mental Health	Healthcare practitioner	The Mental State Examination
Mental Health	Healthcare practitioner	The assessment and management of an aggressive patient
Mental Health	Healthcare practitioner	Psychotic disorder due to another medical condition
Mental Health	Healthcare practitioner	Schizophrenia
Mental Health	Healthcare practitioner	Disorders other than schizophrenia in the schizophrenia spectrum and related disorders
Mental Health	Healthcare practitioner	Substance/ Medication induced psychotic disorder
Mental Health	Healthcare practitioner	Biplolar Disorders- Bipolar (manic/depressed) and Bipolar 2
Mental Health	Healthcare practitioner	Major and Persistent Depressive Disorder
Mental Health	Healthcare practitioner	Alcohol and Cannabis related disorders
Mental Health	Healthcare practitioner	Neuropsychiatric manifestations of HIV
Mental Health	Healthcare practitioner	Basic principles of psychopharmacology
Mental Health	Healthcare practitioner	Panic Disorder
Mental Health	Healthcare practitioner	Generalized anxiety disorder
Mental Health	Healthcare practitioner	Social Anxiety Disorder
Mental Health	Healthcare practitioner	Specific Phobias
Mental Health	Healthcare practitioner	Assessment and management of suicides/ parasuicide
Mental Health	Healthcare practitioner	Adjustment Disorders
Mental Health	Healthcare practitioner	Obsessive compulsive and related disorders
Mental Health	Healthcare practitioner	Attention - Deficit /Hyperactivity Disorder
Mental Health	Healthcare practitioner	Elimination Disorders
Mental Health	Healthcare practitioner	Poor school performance including intellectual disability
Mental Health	Healthcare practitioner	Disruptive,impulse - control and conduct disorders
Mental Health	Healthcare practitioner	Delirium
Mental Health	Healthcare practitioner	Assessment and Evaluation of neurocognitive disorders
Mental Health	Healthcare practitioner	Major and Mild neurocognitive disorders
Mental Health	Healthcare practitioner	Insomnia
Mental Health	Healthcare practitioner	Feeding and Eating Disorders
Mental Health	Healthcare practitioner	Personality Disorders
Mental Health	Healthcare practitioner	Acute and Post traumatic stress disorder
Mental Health	Healthcare practitioner	Somatic symptom and related disorders
Mental Health	Healthcare practitioner	Neuropsychiatric manifestations of Eplilepsy
Mental Health	Healthcare practitioner	Comorbid substance use and Bipolar related disorders
Mental Health	Healthcare practitioner	Antipsychotic medication
Mental Health	Healthcare practitioner	Antidepressant medication
Mental Health	Healthcare practitioner	Anxiolytic medication
Mental Health	Healthcare practitioner	Involuntary and assisted admission of mental health care users
Mental Health	Healthcare practitioner	Borderline Personality Disorder
Mental Health	Healthcare practitioner	Grief
Obstetrics and Gynaecology	Healthcare practitioner	Family Planning
Obstetrics and Gynaecology	Healthcare practitioner	Vaginal discharge syndrome
Obstetrics and Gynaecology	Healthcare practitioner	Contraception
Obstetrics and Gynaecology	Healthcare practitioner	Sexually transmitted diseases
Obstetrics and Gynaecology	Healthcare practitioner	Carcinoma of cervix
Obstetrics and Gynaecology	Healthcare practitioner	Post menopausal bleeding
Obstetrics and Gynaecology	Healthcare practitioner	Pelvic Inflammatory Disease
Obstetrics and Gynaecology	Healthcare practitioner	Dysmenorrhoea
Obstetrics and Gynaecology	Healthcare practitioner	Premenstrual Dysphoric Disorder
Obstetrics and Gynaecology	Healthcare practitioner	Miscarriage/abortion
Obstetrics and Gynaecology	Healthcare practitioner	Ectopic Pregnancy
Obstetrics and Gynaecology	Healthcare practitioner	Dyspareunia
Obstetrics and Gynaecology	Healthcare practitioner	Pelvic Mass
Obstetrics and Gynaecology	Healthcare practitioner	Gestational Trophoblastic Disease
Obstetrics and Gynaecology	Healthcare practitioner	Carcinoma of the Vulva
Obstetrics and Gynaecology	Healthcare practitioner	Chronic Pelvic Pain
Obstetrics and Gynaecology	Healthcare practitioner	Endometrial Carcinoma
Obstetrics and Gynaecology	Healthcare practitioner	Hirsutism
Obstetrics and Gynaecology	Healthcare practitioner	Carcinoma of the ovaries
Obstetrics and Gynaecology	Healthcare practitioner	Ovarian Cyst
Obstetrics and Gynaecology	Healthcare practitioner	Menopause
Obstetrics and Gynaecology	Healthcare practitioner	Uterovaginal Prolapse
Obstetrics and Gynaecology	Healthcare practitioner	Uterine myomas
Obstetrics and Gynaecology	Healthcare practitioner	Bartholin's gland cyst and abscess
Obstetrics and Gynaecology	Healthcare practitioner	Menstrual Disorders
Obstetrics and Gynaecology	Healthcare practitioner	Pre-malignant Disorders of the Cervix
Obstetrics and Gynaecology	Healthcare practitioner	Infertility
Obstetrics and Gynaecology	Healthcare practitioner	Endometriosis
Obstetrics and Gynaecology	Healthcare practitioner	Amenorrhoea
Obstetrics and Gynaecology	Healthcare practitioner	Recurrent pregnancy loss
Obstetrics and Gynaecology	Healthcare practitioner	Abnormal uterine bleeding
Obstetrics and Gynaecology	Healthcare practitioner	Pubertal development
Obstetrics and Gynaecology	Healthcare practitioner	Polycystic Ovarian Syndrome
Obstetrics and Gynaecology	Healthcare practitioner	Urinary Incontinence
Obstetrics and Gynaecology	Healthcare practitioner	Carcinoma of the vagina
Obstetrics and Gynaecology	Healthcare practitioner	Congenital Anomalies of Female Urogenital System
Obstetrics and Gynaecology	Healthcare practitioner	Non-neoplastic Disorders of the Vulva
Obstetrics and Gynaecology	Healthcare practitioner	Attending a woman in labour
Obstetrics and Gynaecology	Healthcare practitioner	Prolonged labour
Obstetrics and Gynaecology	Healthcare practitioner	Cervicitis
Obstetrics and Gynaecology	Healthcare practitioner	Cord presentation /cord prolapse
Obstetrics and Gynaecology	Healthcare practitioner	Shoulder dystocia
Obstetrics and Gynaecology	Healthcare practitioner	Hyperemesis gravidarum
Obstetrics and Gynaecology	Healthcare practitioner	Intra-uterine death
Obstetrics and Gynaecology	Healthcare practitioner	Antenatal care
Obstetrics and Gynaecology	Healthcare practitioner	Fetal distress
Obstetrics and Gynaecology	Healthcare practitioner	Induction of labour
Obstetrics and Gynaecology	Healthcare practitioner	Normal labour and partogram
Obstetrics and Gynaecology	Healthcare practitioner	Normal puerperium
Obstetrics and Gynaecology	Healthcare practitioner	Infection in pregnancy
Obstetrics and Gynaecology	Healthcare practitioner	Antepartum haemorrhage
Obstetrics and Gynaecology	Healthcare practitioner	Postpartum haemorrhage
Obstetrics and Gynaecology	Healthcare practitioner	Premature rupture of membranes
Obstetrics and Gynaecology	Healthcare practitioner	Anaemia of pregnancy
Obstetrics and Gynaecology	Healthcare practitioner	Vaginal birth after caesarean section (VBAC)
Obstetrics and Gynaecology	Healthcare practitioner	Mastitis
Obstetrics and Gynaecology	Healthcare practitioner	Breech presentation
Obstetrics and Gynaecology	Healthcare practitioner	Breasts : inspection,lactation
Obstetrics and Gynaecology	Healthcare practitioner	Multiple pregnancy
Obstetrics and Gynaecology	Healthcare practitioner	Maternal mortality
Obstetrics and Gynaecology	Healthcare practitioner	Rupture of uterus
Obstetrics and Gynaecology	Healthcare practitioner	Premature labour
Obstetrics and Gynaecology	Healthcare practitioner	Chorio-amnionitis
Obstetrics and Gynaecology	Healthcare practitioner	Puerperal sepsis
Obstetrics and Gynaecology	Healthcare practitioner	Thromboembolism in obstetrics
Obstetrics and Gynaecology	Healthcare practitioner	Pregnancy induced hypertension
Obstetrics and Gynaecology	Healthcare practitioner	Malrotation and malpresentation (excluding breech)
Obstetrics and Gynaecology	Healthcare practitioner	Pyrexia in pregnancy
Obstetrics and Gynaecology	Healthcare practitioner	Postpartum collapse
Obstetrics and Gynaecology	Healthcare practitioner	Uterine inversion
Obstetrics and Gynaecology	Healthcare practitioner	Cardiac disease in pregnancy
Obstetrics and Gynaecology	Healthcare practitioner	Diabetes in pregnancy
Obstetrics and Gynaecology	Healthcare practitioner	Disproportionate fetal growth
Obstetrics and Gynaecology	Healthcare practitioner	Analgesia and anaesthesia in pregnancy
Obstetrics and Gynaecology	Healthcare practitioner	Selection of high-risk pregnancy for hospitalisation or clinical care
Obstetrics and Gynaecology	Healthcare practitioner	Retained placenta
Obstetrics and Gynaecology	Healthcare practitioner	Hypertension in pregnancy
Obstetrics and Gynaecology	Healthcare practitioner	Intra-uterine growth restriction
Obstetrics and Gynaecology	Healthcare practitioner	Trauma of the lower genital tract
Obstetrics and Gynaecology	Healthcare practitioner	Pain relief in labour
Obstetrics and Gynaecology	Healthcare practitioner	Long Acting Reversible Contraception
Obstetrics and Gynaecology	Healthcare practitioner	Please add any other knowledge, skills, attitudes and behaviours that you think should be added to the core curriculum.
Obstetrics and Gynaecology	Healthcare practitioner	Polyhydramnios/Oligohydramnios
Skills	Healthcare practitioner	Preoperative assessment of a patient and presentations to a senior
Skills	Healthcare practitioner	Perform an appropriate clinical examination in a child, adult or pregnancy woman
Skills	Healthcare practitioner	Elicit and interpret all clinical signs
Skills	Healthcare practitioner	Formulate a reasonable diagnosis and establish an appropriate differential diagnosis
Skills	Healthcare practitioner	Use and interpret laboratory investigations rationally
Skills	Healthcare practitioner	Order and interpret commonly used X-Rays
Skills	Healthcare practitioner	Institute management of common conditions and medical emergencies
Skills	Healthcare practitioner	Demonstrate inhaler and spacer technique
Skills	Healthcare practitioner	Assess visual acuity using Snellen's chart
Skills	Healthcare practitioner	Perform a well-newborn check
Skills	Healthcare practitioner	Perform a mini-mental state examination
Skills	Healthcare practitioner	Measure Glasgow Coma Scale
Skills	Healthcare practitioner	Monitor patient during anaesthetic
Skills	Healthcare practitioner	Assess adequacy of the airway
Skills	Healthcare practitioner	Make a preoperative assessment of a patient
Skills	Healthcare practitioner	Monitor patient in recovery room
Skills	Healthcare practitioner	Obtain airway control using a mask
Skills	Healthcare practitioner	Administer oxygen
Skills	Healthcare practitioner	Reverse muscle relaxation
Skills	Healthcare practitioner	Check anaesthetic equipment
Skills	Healthcare practitioner	Perform a ring block
Skills	Healthcare practitioner	Perform inhalation induction
Skills	Healthcare practitioner	Perform penile block
Skills	Healthcare practitioner	Set airflows - McGill, circle, T-piece
Skills	Healthcare practitioner	Sterilise equipmenT
Skills	Healthcare practitioner	Ventilate using anaesthetic machine
Skills	Healthcare practitioner	Manage perioperative hypotension, hypoxia and dysrhythmias
Skills	Healthcare practitioner	Perform intravenous induction
Skills	Healthcare practitioner	Administer ketamine sedation
Skills	Healthcare practitioner	Use laryngeal mask for airway management
Skills	Healthcare practitioner	Administer conscious sedation
Skills	Healthcare practitioner	Administer a spinal anaesthetic
Skills	Healthcare practitioner	Administer a general anaesthetic
Skills	Healthcare practitioner	Perform direct laryngoscopy and Intubate the trachea
Skills	Healthcare practitioner	Perform rapid sequence induction of anaesthesia
Skills	Healthcare practitioner	Perform fine needle aspiration of a lymph node
Skills	Healthcare practitioner	Take a nasal and throat swab
Skills	Healthcare practitioner	Measure peak expiratory flow rate
Skills	Healthcare practitioner	Record a 12-channel ECG
Skills	Healthcare practitioner	Collect a pus swab
Skills	Healthcare practitioner	Collect a venous blood sample
Skills	Healthcare practitioner	Collect an arterial blood sample
Skills	Healthcare practitioner	Measure blood glucose with a glucometer
Skills	Healthcare practitioner	Measure haemoglobin with a hamoglobinometer
Skills	Healthcare practitioner	Obtain a capillary blood sample from heel or finger
Skills	Healthcare practitioner	Perform a blood culture
Skills	Healthcare practitioner	Perform a conjunctival swab
Skills	Healthcare practitioner	Perform a Mantoux or tine test
Skills	Healthcare practitioner	Perform a Papanicolaou smear
Skills	Healthcare practitioner	Obtain a clean-catch urine specimen
Skills	Healthcare practitioner	Perform abdominal paracentesis
Skills	Healthcare practitioner	Perform a lumbar puncture
Skills	Healthcare practitioner	Perform proctoscopy
Skills	Healthcare practitioner	Perform a lumbar puncture - child
Skills	Healthcare practitioner	Collect a femoral vein blood sample
Skills	Healthcare practitioner	Perform a skin biopsy - punch or elliptical
Skills	Healthcare practitioner	Perform induced-sputum collection
Skills	Healthcare practitioner	Perform fine-needle aspiration biopsy of other soft tissue mass
Skills	Healthcare practitioner	Take a urethral swab
Skills	Healthcare practitioner	Perform fine-needle aspiration biopsy of a breast lump
Skills	Healthcare practitioner	Perform endometrial biopsy
Skills	Healthcare practitioner	Issue a sick certificate
Skills	Healthcare practitioner	Estimate gestational age of a newborn
Skills	Healthcare practitioner	Assess mental status
Skills	Healthcare practitioner	Calculate percentage burn in a burns patient
Skills	Healthcare practitioner	Perform primary and secondary survey of a trauma patient
Skills	Healthcare practitioner	Assess fetal movement and wellbeing
Skills	Healthcare practitioner	Perform a paediatric growth assessment and plot on a growth chart
Skills	Healthcare practitioner	Assess a diabetic foot
Skills	Healthcare practitioner	Assess fetal wellbeing in labour
Skills	Healthcare practitioner	Rapid triage of the child presenting with acute conditions in casualty/out patients
Skills	Healthcare practitioner	Examine and document a victim of sexual assault and collect appropriate samples
Skills	Healthcare practitioner	Examine an assault victim and complete a J88 form
Skills	Healthcare practitioner	Perform a developmental assessment in a child
Skills	Healthcare practitioner	Perform a risk assessment for suicide or potential harm to others
Skills	Healthcare practitioner	Assess and document violence by an intimate partner
Skills	Healthcare practitioner	Assess and document an allegedly intoxicated driver and draw a blood sample
Skills	Healthcare practitioner	Assess a child for sexual or other abuse
Skills	Healthcare practitioner	Follow a patient up in accordance with the Mental Health Care Act
Skills	Healthcare practitioner	Assess progress of labour using a partogram
Skills	Healthcare practitioner	Carry out a cardiotocographic assessment
Skills	Healthcare practitioner	Perform vaginal speculum examination in pregnancy and labour
Skills	Healthcare practitioner	Interpret a partogram
Skills	Healthcare practitioner	Perform manual removal of placenta
Skills	Healthcare practitioner	Perform a normal vaginal delivery
Skills	Healthcare practitioner	Perform a vaginal breech delivery
Skills	Healthcare practitioner	Perform an assisted vaginal delivery
Skills	Healthcare practitioner	Perform a caesarean section
Skills	Healthcare practitioner	Repair a third degree vaginal tear
Skills	Healthcare practitioner	Apply a below-knee or below-elbow cast
Skills	Healthcare practitioner	Apply a splint
Skills	Healthcare practitioner	Immobilize the spine
Skills	Healthcare practitioner	Apply a plaster backslab
Skills	Healthcare practitioner	Apply finger and hand splints
Skills	Healthcare practitioner	Set up skin traction
Skills	Healthcare practitioner	Reduce a dislocated shoulder
Skills	Healthcare practitioner	Reduce a dislocated tempromandibular joint
Skills	Healthcare practitioner	Set up skeletal traction
Skills	Healthcare practitioner	Reduce a closed fracture of hand or forearm
Skills	Healthcare practitioner	Perform cardiopulmonary resuscitation - adult
Skills	Healthcare practitioner	Intubate and ventilate patient
Skills	Healthcare practitioner	Remove a foreign body from the oropharynx
Skills	Healthcare practitioner	Prescribe and administer intravenous fluid therapy
Skills	Healthcare practitioner	Administer a blood transfusion
Skills	Healthcare practitioner	Manage the airway
Skills	Healthcare practitioner	Perform bag-and-mask ventilation
Skills	Healthcare practitioner	Perform cardiopulmonary resuscitation - child
Skills	Healthcare practitioner	Relieve a tension pneumothorax
Skills	Healthcare practitioner	Insert a central venous line
Skills	Healthcare practitioner	Perform cricothyroidotomy
Skills	Healthcare practitioner	Set up external electrical cardiac pacing
Skills	Healthcare practitioner	Perform synchronized cardioversion
Skills	Healthcare practitioner	Clean and dress a wound
Skills	Healthcare practitioner	Close or suture a wound
Skills	Healthcare practitioner	Obtain pressure control of haemorrhage
Skills	Healthcare practitioner	Suture lacerations
Skills	Healthcare practitioner	Suture the pinna or ear lobe
Skills	Healthcare practitioner	Remove an embedded splinter or fish hook
Skills	Healthcare practitioner	Reduce a paraphimosis
Skills	Healthcare practitioner	Perform evacuation of the uterus
Skills	Healthcare practitioner	Perform dilation and curettage of uterus
Skills	Healthcare practitioner	Drain a subungual haematoma
Skills	Healthcare practitioner	Incise and drain a perianal haematoma
Skills	Healthcare practitioner	Incise and drain an abscess
Skills	Healthcare practitioner	Debride a wound
Skills	Healthcare practitioner	Drain a Bartholin's cyst or abscess
Skills	Healthcare practitioner	Excise lumps and such as a sebaceous cyst
Skills	Healthcare practitioner	Drain a hydrocoele
Skills	Healthcare practitioner	Suture an eyelid
Skills	Healthcare practitioner	Perform venous cut-down
Skills	Healthcare practitioner	Perform tubal ligation
Skills	Healthcare practitioner	Perform appendicectomy
Skills	Healthcare practitioner	Perform a circumcision
Skills	Healthcare practitioner	Excise a breast fibro-adenoma
Skills	Healthcare practitioner	Perform lymph node excision biopsy
Skills	Healthcare practitioner	Incise and drain a Meibomian cyst
Skills	Healthcare practitioner	Administer inhaled medication using aerosol and spacer
Skills	Healthcare practitioner	Administer a nebuliser
Skills	Healthcare practitioner	Set up intravenous infusion
Skills	Healthcare practitioner	Catheterise the bladder
Skills	Healthcare practitioner	Perform a dry mopping of the ear
Skills	Healthcare practitioner	Instill eye drops or apply ointment
Skills	Healthcare practitioner	Administer subcutaneous injection
Skills	Healthcare practitioner	Use a metered dose inhaler
Skills	Healthcare practitioner	Administer intramuscular injection
Skills	Healthcare practitioner	Administer intravenous injection
Skills	Healthcare practitioner	Perform cryotherapy /cauterization
Skills	Healthcare practitioner	Perform eye washout for chemical burns
Skills	Healthcare practitioner	Perform gastric lavage
Skills	Healthcare practitioner	Perform pleural paracentesis
Skills	Healthcare practitioner	Prepare a critically ill patientfor transport
Skills	Healthcare practitioner	Remove a foreign body form the ear, eye, nos
Skills	Healthcare practitioner	Insert and Remove an intercostal drain
Skills	Healthcare practitioner	Set up an incubator
Skills	Healthcare practitioner	Set up intra-osseous infusion
Skills	Healthcare practitioner	Syringe the ear
Skills	Healthcare practitioner	Insert a suprapubic bladder catheter
Skills	Healthcare practitioner	Set up phototherapy for jaundiced baby
Skills	Healthcare practitioner	Insert a stomach tube - neonate /child
Skills	Healthcare practitioner	Administer rabies prophylaxis
Skills	Healthcare practitioner	Apply a compression dressing to a venous ulcer
Skills	Healthcare practitioner	Cannulate the umbilical vein
Skills	Healthcare practitioner	Canulate a scalp vein
Skills	Healthcare practitioner	Drain a stye
Skills	Healthcare practitioner	Insert a nasogastric tube
Skills	Healthcare practitioner	Insert a urinary catheter - child /neonate/adult
Skills	Healthcare practitioner	Pack nose and cauterize for epistaxis
Skills	Healthcare practitioner	Insert an intrauterine contraceptive device
Skills	Healthcare practitioner	Perform umbilical vein catheterization
Skills	Healthcare practitioner	Insert a baloon into uterus for haemostasis
Skills	Healthcare practitioner	Aspirate and inject a knee joint
Skills	Healthcare practitioner	Perform venesection
Skills	Healthcare practitioner	Inject tennis elbow /golfer's elbow
Skills	Healthcare practitioner	Insert an intercostal drain - child /neonate
Skills	Healthcare practitioner	Set up a syringe driver
Surgical disciplines	Healthcare practitioner	Introduction to anaesthesia equipment and patient monitors.
Surgical disciplines	Healthcare practitioner	Emergency Care
Surgical disciplines	Healthcare practitioner	Resuscitation of the Trauma Patient
Surgical disciplines	Healthcare practitioner	Secondary Survery and Systematic assessment of organ injury
Surgical disciplines	Healthcare practitioner	Medical Emergency management - Cardiac Arrest Adult and child ACLS
Surgical disciplines	Healthcare practitioner	Medical Emergency Management - Anaphylaxis, Acute Severe Asthma and Endocrine
Surgical disciplines	Healthcare practitioner	Medical Emergency Management: Acute Coronary Syndrome and Acute Stroke
Surgical disciplines	Healthcare practitioner	Damage Control for unstable major trauma
Surgical disciplines	Healthcare practitioner	Trauma Systems and management of Major Incidents
Surgical disciplines	Healthcare practitioner	Trauma in Special populations
Surgical disciplines	Healthcare practitioner	Burn Care - prevention, resuscitation and rehabilitation
Surgical disciplines	Healthcare practitioner	Basics of Applied Critical Care relevant to all medical practitioners
Surgical disciplines	Healthcare practitioner	Toxicology and poisoning
Surgical disciplines	Healthcare practitioner	Upper Limb Trauma and orthoaedic emergencies
Surgical disciplines	Healthcare practitioner	Lower Limb and Pelvis
Surgical disciplines	Healthcare practitioner	Orthopaedic consultations
Surgical disciplines	Healthcare practitioner	Spine pathology
Surgical disciplines	Healthcare practitioner	Introduction to hypnotic agents and muscle relaxants
Surgical disciplines	Healthcare practitioner	Preoperative assessment and airway skills
Surgical disciplines	Healthcare practitioner	Intravenous fluids and blood products
Surgical disciplines	Healthcare practitioner	Acute pain management
Surgical disciplines	Healthcare practitioner	Anaesthesia for the trauma patient
Surgical disciplines	Healthcare practitioner	Local anaesthetic agents
Surgical disciplines	Healthcare practitioner	Perioperative complications
Surgical disciplines	Healthcare practitioner	Perioperative management of a trauma patient for emergency surgery.
Surgical disciplines	Healthcare practitioner	Perioperative management of a cardiac patient for elective general anaesthesia
Surgical disciplines	Healthcare practitioner	Neuraxial anaesthesia
Surgical disciplines	Healthcare practitioner	Obstetric anaesthesia
Surgical disciplines	Healthcare practitioner	Post Mortem
Surgical disciplines	Healthcare practitioner	Post anaesthesia care unit
Surgical disciplines	Healthcare practitioner	Sedation
Surgical disciplines	Healthcare practitioner	Management of the non trauma airway
Surgical disciplines	Healthcare practitioner	Breast Disease
Surgical disciplines	Healthcare practitioner	Thyroid disease
Surgical disciplines	Healthcare practitioner	Skin Disorders
Surgical disciplines	Healthcare practitioner	Soft Tissue Tumours
Surgical disciplines	Healthcare practitioner	Dysphagia and Oesophageal Cancer
Surgical disciplines	Healthcare practitioner	Perianal Disease
Surgical disciplines	Healthcare practitioner	Obstructive Jaundice
Surgical disciplines	Healthcare practitioner	Intestinal Obstruction and Abdominal Wall Hernias
Surgical disciplines	Healthcare practitioner	Colorectal Cancer and Polyps
Surgical disciplines	Healthcare practitioner	Fluids and Electrolytes Blood Transfusion,Nutrition in the Surgical Patient and Shock
Surgical disciplines	Healthcare practitioner	Surgical Patient Care Including Antibiotic Use
Surgical disciplines	Healthcare practitioner	Abdominal Masses
Surgical disciplines	Healthcare practitioner	Acute Abdominal Pain Including Acute Pancreatitis
Surgical disciplines	Healthcare practitioner	Assisting in the Operating theatre
Surgical disciplines	Healthcare practitioner	Upper Gastrointestinal Bleeding
Surgical disciplines	Healthcare practitioner	Lower Gastrointestinal Bleeding
Surgical disciplines	Healthcare practitioner	Diabetes and the Surgeon
Surgical disciplines	Healthcare practitioner	Burns
Surgical disciplines	Healthcare practitioner	Resuscitation
Surgical disciplines	Healthcare practitioner	Abdominal Trauma
Surgical disciplines	Healthcare practitioner	Thoracic Trauma
Surgical disciplines	Healthcare practitioner	Vascular Trauma
Surgical disciplines	Healthcare practitioner	Traumatic Brain injury (TBI)
Surgical disciplines	Healthcare practitioner	Peripheral Vascular Disease
Surgical disciplines	Healthcare practitioner	Abdominal Aortic Aneurysms
Surgical disciplines	Healthcare practitioner	Venous and Lymphatic Disorders
Surgical disciplines	Healthcare practitioner	Hearing Loss, Dizziness and Vertigo
Surgical disciplines	Healthcare practitioner	Nasal Obstruction
Surgical disciplines	Healthcare practitioner	Neck Lumps
Surgical disciplines	Healthcare practitioner	Otorrhea, Otitis Media- Acute and Chronic
Surgical disciplines	Healthcare practitioner	Acute and Chronic Airway Obstruction
Surgical disciplines	Healthcare practitioner	Dysphagia
Surgical disciplines	Healthcare practitioner	Dysphonia
Surgical disciplines	Healthcare practitioner	Arthritis and joint pathology
Surgical disciplines	Healthcare practitioner	Orthopaedic Trauma
Surgical disciplines	Healthcare practitioner	Paediatric Orthopaedics
Surgical disciplines	Healthcare practitioner	Tumour and Sepsis
Surgical disciplines	Healthcare practitioner	Anatomy of the Eye , The Slit Lamp Exam
Surgical disciplines	Healthcare practitioner	Introduction to Cataracts
Surgical disciplines	Healthcare practitioner	Diabetic retinopathy
Surgical disciplines	Healthcare practitioner	Infections of the eye and adnexae
Surgical disciplines	Healthcare practitioner	Glaucoma
Surgical disciplines	Healthcare practitioner	Paediatric Eye Exam
Surgical disciplines	Healthcare practitioner	Eye Trauma
Surgical disciplines	Healthcare practitioner	Non Emergency Urological Conditions
Surgical disciplines	Healthcare practitioner	Urological Infections
Surgical disciplines	Healthcare practitioner	Urological Trauma
Surgical disciplines	Healthcare practitioner	Urological Malignancies
Surgical disciplines	Healthcare practitioner	Paediatric Urology
Surgical disciplines	Healthcare practitioner	Urological Emergencies
Surgical disciplines	Healthcare practitioner	Investigations in Urology
Surgical disciplines	Healthcare practitioner	Plaster Techniques
Surgical disciplines	Healthcare practitioner	Renal stones; stone disease; management of haematuria
Surgical disciplines	Healthcare practitioner	Benign Prostatic Hypertrophy (BPH)
Surgical disciplines	Healthcare practitioner	Male contraception
Surgical disciplines	Healthcare practitioner	Surgical Patient Care including Antibiotic Use
Surgical disciplines	Healthcare practitioner	Chronic Hip problem
Surgical disciplines	Healthcare practitioner	Chronic Knee problem
Surgical disciplines	Healthcare practitioner	Foot Deformity
Surgical disciplines	Healthcare practitioner	Peripheral Nerve Injury
Surgical disciplines	Healthcare practitioner	Long Bone Deformity in a child
Surgical disciplines	Healthcare practitioner	Osteomyelitis of long bone in children
Integrated Primary Care	Leader and manager	Implement principles of chronic care.
Integrated Primary Care	Leader and manager	Clinical Audit
Integrated Primary Care	Leader and manager	Adverse incidents in Health care
Integrated Primary Care	Leader and manager	Private practice management
Integrated Primary Care	Leader and manager	Quality improvement project
Integrated Primary Care	Leader and manager	The district health system
Integrated Primary Care	Leader and manager	Role model
Integrated Primary Care	Leader and manager	Learning styles and teamwork
Integrated Primary Care	Leader and manager	PHC Re-engineering
Integrated Primary Care	Leader and manager	Management of Self
Obstetrics and Gynaecology	Leader and manager	Perinatal morbidity and mortality
Skills	Leader and manager	Develop and use flowcharts for chronic care
Skills	Leader and manager	Set up and supervise kangaroo mother care
Skills	Leader and manager	Understand and apply the MHCA
Skills	Leader and manager	Complete an ICD-10 coding form
Surgical disciplines	Leader and manager	Forensic Medicine - Basics
Child Health	Professional	Write a referral letter
Child Health	Professional	Write a discharge summary
Child Health	Professional	Ethics in clincial practice
Mental Health	Professional	Transfer to a psychiatric hospital
Skills	Professional	Write a discharge summary
Skills	Professional	Write comprehensive clinical notes for inpatients and outpatients
Skills	Professional	Write a prescription
Skills	Professional	Complete a disability grant form
Child Health	Scholar	Undertaking a critical appraisal of records
Child Health	Scholar	Use of learning portfolios
Integrated Primary Care	Scholar	Reflective journalling
Skills	Scholar	Reflect on ones own strengths and weaknesses and develop an appropriate learning plan

## Sheet: Supp Table 2 HCP content
	Healthcare practitioner content
	Content	% Consensus achieved
	Mental Health
1	Signs and symptoms of mental illness	100
2	The Mental State Examination	100
3	The assessment and management of an aggressive patient	100
4	Psychotic disorder due to another medical condition	100
5	Schizophrenia	92.9
6	Substance/ Medication-induced psychotic disorder	100
7	Bipolar Disorders- Bipolar (manic/depressed) and Bipolar 2	92.9
8	Major and Persistent Depressive Disorder	85.7
9	Alcohol and Cannabis related disorders	100
10	Neuropsychiatric manifestations of HIV	92.7
11	Basic principles of psychopharmacology	92.9
12	Panic Disorder	100
13	Generalised anxiety disorder	100
14	Advocacy and Support Groups	71.4
15	Assessment and management of suicides/ parasuicide	100
16	Adjustment Disorders	78.6
17	Feeding and Eating Disorders	70.6
18	Obsessive-compulsive and related disorders	71.4
19	Attention - Deficit /Hyperactivity Disorder	100
20	Insomnia	78.6
21	Poor school performance, including intellectual disability	78.6
22	Acute and post-traumatic stress disorder	92.9
23	Neuropsychiatric manifestations of Eplilepsy	85.7
24	Comorbid substance use and Bipolar related disorders	85.7
25	Antipsychotic medication	100
26	Antidepressant medication	100
27	Anxiolytic medication	92.9
28	Grief	85.7
29	Social anxiety disorders	82.4
30	Disruptive, impulse - control and conduct disorders	76.5
31	Personality Disorders	76.5
32	Somatic symptoms and related disorders	75
33	Delirium	100
34	Assessment and Evaluation of Neurocognitive Disorders.	85.7
35	Borderline Personality Disorder	70.6
36	Major and Mild neurocognitive disorders	85.7
	Child Health
1	Feeding and Nutrition	100
2	Breastfeeding	92.7
3	Approach to Protein Energy Malnutrition/ Failure to thrive	100
4	An Approach to gastroenteritis and dehydration	100
5	Approach to Renal Exam and Renal Failure	100
6	Approach to Acute Lower Respiratory Tract Infections	100
7	Approach to Chronic Lung Disease	85.7
8	Common Genetic conditions	100
9	CNS/ Normal Development/ Milestones	100
10	Approach to a floppy Infant	100
11	Meningitis	92.9
12	An approach to a bleeding child	92.9
13	Anaemia/ Lymphadenopathy	100
14	Approach to CVS Examination and CCF	100
15	Abdominal Examination and approach to Jaundice in children	100
16	Tuberculosis	100
17	HIV infection in children	100
18	Common Paediatrics Problems	100
19	Allergies in children	100
20	Paediatric Cardiac Disease	92.9
21	Epilepsy in children	100
22	Hepatic diseases	92.9
23	Renal diseases in children	92.9
24	Recognition and management of common skin conditions	100
25	The road to health book	100
26	Extended Programme of Immunization	100
27	Recognition of the malnourished and obese child	100
28	Integrated Management of Childhood Illnesses	92.9
29	Examination skills of all systems	100
30	Maternal Breast Feeding Health Care Initiative/ Kangaroo Mother Care	78.6
31	General and Acute Malnutrition	100
32	Integrated Management & Assessment of Malnutrition	78.6
33	Human Immunodeficiency Virus: Epidemiology, Diagnosis and Treatment	92.9
34	Epilepsy in childhood	100
35	The Blue Child: Cardiac or Respiratory?	100
36	Tuberculosis: Assessment, Treatment, Prophylaxis	100
37	Care of children with common cardiac conditions	92.9
38	Care of children with common urogenital illnesses	85.7
39	Care of children with common neurological illnesses	100
40	Care of children with common respiratory illnesses	92.9
41	Care of children with common gastrointestinal illnesses	92.9
42	Care of children with common metabolic conditions	85.7
43	Recognition and management of common infectious conditions	92.9
44	Recognition and management of common uncomplicated causes of fever	92.9
45	Recognition and management of common ENT, eye and mouth conditions	100
46	Recognition and management of simple feeding difficulties	100
47	Recognition and management of allergic conditions	92.9
48	Recognition and management of respiratory distress syndrome	100
49	Recognition and management of hypoxic-ischemic encephalopathy	100
50	Recognition and management of neonatal jaundice	100
51	Recognition and emergency management of a neonate with congenital heart disease	92.9
52	Management of acute respiratory distress and failure	100
53	Management of shock and dehydration	100
54	Management of diabetic ketoacidosis	100
55	Management of status epilepticus	100
56	Management of acute cardiac failure	100
57	Management of acute haematological crisis	85.7
58	Care of children with musculoskeletal conditions	85.7
59	Paediatric radiology	85.7
60	Paediatric resuscitation	100
61	Undertaking and interpreting stool, urine and sputum microscopy and smear	78.6
62	Basic pharmacology related to dosing of children	100
63	Undertaking a comprehensive clerking of a paediatric patient	100
64	Downs Syndrome	92.9
65	Pain Control & Pharmacology	100
66	Necrotising Enterocolitis & Abdominal Pathology in the neonate	85.7
67	Neonatal Resuscitation Skills & Scenarios	100
68	The septic neonate	100
69	Congenital Abnormalities and approach to the dysmorphic Baby	100
70	Respiratory Distress in the Neonate	100
	Integrated Primary Care
1	Approach to the acute red eye	100
2	Approach to sudden loss of vision	92.9
3	Approach to slow loss of vision	92.9
4	Approach to abnormal ocular appearance	92.9
5	Approach to ocular trauma	92.9
6	Approach to HIV and the eye	92.9
7	Examination of a pregnant patient	100
8	Basic Antenatal Care in Primary Care	92.9
9	ENT Infections	100
10	Epistaxis	100
11	Nasal Obstruction	92.9
12	Oral Cavity conditions	100
13	ENT Anatomy and Physiology	78.6
14	Nose/ Oral Cavity anatomy & examination	92.9
15	Ear anatomy and examination	92.9
16	Airway Management	92.9
17	Causes of abdominal pain + referred pain	92.9
18	The acute abdomen	100
19	Wound management (incl. dressings)	100
20	Breast examination and approach to breast lump	100
21	Vascular: History taking/ examination / peripheral vascular dx	85.7
22	Infections and abscesses	100
23	Thyroid conditions	92.9
24	An approach to a patient with HIV	100
25	Fundoscopy -slide show	78.6
26	PMTCT	100
27	Human sexuality	78.6
28	Primary emergency care	100
29	ECG and data interpretation	92.9
30	Approach to trauma patient	100
31	Approach to medical emergencies and the undifferentiated patient	100
32	Approach to paediatric emergencies	100
33	Palliative care emergencies	85.7
34	Palliative care - an introduction	85.7
35	Palliative care pharmacology	85.7
36	Pain management in palliative care	85.7
37	Breathlessness in palliative care	78.6
38	ENT conditions
	Surgical disciplines
1	Introduction to anaesthesia equipment and patient monitors.	100
2	Emergency Care	100
3	Resuscitation of the Trauma Patient	100
4	Secondary Survey and Systematic assessment of organ injury	100
5	Medical Emergency management - Cardiac Arrest Adult and child ACLS	85.7
6	Medical Emergency Management - Anaphylaxis, Acute Severe Asthma and Endocrine	92.9
7	Medical Emergency Management: Acute Coronary Syndrome and Acute Stroke	92.9
8	Damage Control for unstable major trauma	92.9
9	Trauma in Special populations	85.7
10	Burn care - prevention, resuscitation and rehabilitation	100
11	Basics of Applied Critical Care relevant to all medical practitioners	92.9
12	Toxicology and poisoning	100
13	Upper Limb Trauma and orthopaedic emergencies	100
14	Lower Limb and Pelvis	100
15	Orthopaedic consultations	100
16	Spine pathology	100
17	Introduction to hypnotic agents and muscle relaxants	100
18	Preoperative assessment and airway skills	100
19	Intravenous fluids and blood products	100
20	Acute pain management	100
21	Anaesthesia for the trauma patient	100
22	Local anaesthetic agents	100
23	Perioperative complications	100
24	Perioperative management of a trauma patient for emergency surgery.	100
25	Perioperative management of a cardiac patient for elective general anaesthesia	85.7
26	Neuraxial anaesthesia	85.7
27	Obstetric anaesthesia	100
28	Post anaesthesia care unit	100
29	Sedation	100
30	Management of the non-trauma airway	100
31	Breast Disease	100
32	Thyroid disease	100
33	Skin Disorders	92.9
34	Soft Tissue Tumours	100
35	Dysphagia and Oesophageal Cancer	100
36	Perianal Disease	100
37	Obstructive Jaundice	100
38	Intestinal Obstruction and Abdominal Wall Hernias	100
39	Colorectal Cancer and Polyps	100
40	Fluids and Electrolytes Blood Transfusion, Nutrition in the Surgical Patient and Shock	100
41	Surgical Patient Care Including Antibiotic Use	100
42	Abdominal Masses	100
43	Acute Abdominal Pain, Including Acute Pancreatitis	100
44	Assisting in the Operating theatre	100
45	Upper Gastrointestinal Bleeding	100
46	Lower Gastrointestinal Bleeding	100
47	Diabetes and the Surgeon	92.9
48	Burns	100
49	Resuscitation	100
50	Abdominal Trauma	100
51	Thoracic Trauma	100
52	Vascular Trauma	100
53	Traumatic Brain Injury (TBI)	100
54	Peripheral Vascular Disease	100
55	Abdominal Aortic Aneurysms	100
56	Venous and Lymphatic Disorders	100
57	Hearing Loss, Dizziness and Vertigo	100
58	Nasal Obstruction	92.9
59	Neck Lumps	92.9
60	Otorrhea, Otitis Media- Acute and Chronic	92.9
61	Acute and Chronic Airway Obstruction	100
62	Dysphagia	100
63	Dysphonia	100
64	Arthritis and joint pathology	100
65	Orthopaedic Trauma	100
66	Paediatric Orthopaedics	100
67	Tumour and Sepsis	100
68	Anatomy of the Eye, The Slit Lamp Exam	71.4
69	Introduction to Cataracts	92.9
70	Diabetic retinopathy	100
71	Infections of the eye and adnexa	92.9
72	Glaucoma	92.9
73	Paediatric Eye Exam	92.9
74	Eye Trauma	100
75	Non-Emergency Urological Conditions	85.7
76	Urological Infections	100
77	Urological Trauma	92.9
78	Urological Malignancies	85.7
79	Paediatric Urology	85.7
80	Urological Emergencies	100
81	Investigations in Urology	100
82	Plaster Techniques	92.9
83	Renal stones	100
84	Benign Prostatic Hypertrophy (BPH)	100
85	Male contraception	85.9
86	Surgical Patient Care, including Antibiotic Use	92.9
87	Chronic Hip problem	100
88	Chronic Knee problem	100
89	Foot Deformity	92.9
90	Peripheral Nerve Injury	100
91	Long Bone Deformity in a Child	92.9
92	Osteomyelitis of long bone in children	100
	Internal Medicine
1	Introduction to common disorders of the renal system	100
2	Hypertension	100
3	Valvular Heart Disease	100
4	Pericardial Disease	92.9
5	Ischaemic Heart Disease	100
6	Infective Endocarditis	100
7	Congestive Cardiac Failure	100
8	Cardiogenic Shock	100
9	Pulmonary Hypertension	100
10	Cardiomyopathy	100
11	Syncope	92.9
12	Pulmonary Embolus	100
13	Ischaemic and Non-Ischaemic Chest Pain	100
14	Psoriasis and Papulosquamous Disorders	92.9
15	Acne and Eczema	100
16	Urticaria and Drug Eruptions	100
17	HIV and Skin Disorders	100
18	Cutaneous Manifestations of Systemic Disease	100
19	Pituitary disorders	92.9
20	Parathyroid disorders	92.9
21	Adrenal gland disorders	92.9
22	Thyroid gland disorders	100
23	Diabetes mellitus	100
24	Hypercholesterolaemia	100
25	Patient management in the healthcare team	92.9
26	Acute Liver Disease	100
27	Chronic pancreatitis	100
28	Cirrhosis and liver failure	100
29	Gastro-oesophageal reflux disease and peptic ulcer disease	100
30	Acute, chronic, and related diarrhoea	100
31	Inflammatory bowel disease	92.9
32	Abdominal tuberculosis	100
33	Irritable bowel syndrome	92.9
34	GIT and liver anatomy and physiology	100
35	Principles of Geriatric Medicine	92.9
36	Urinary Incontinence in the elderly	100
37	Falls in the elderly	100
38	Infections in the elderly	92.9
39	Dementia	100
40	Frailty	85.7
41	Confusion in the elderly	92.9
42	Comprehensive geriatric assessment	92.9
43	Osteoporosis	100
44	Bleeding disorders	100
45	Thrombocytopaenia	92.9
46	Anaemia	100
47	Leukaemia	85.7
48	Leucocytosis	92.9
49	Pancytopenia	92.9
50	Idiopathic Thrombocytopenic Purpura	85.7
51	Principles of haematology	92.9
52	Essential skills in haematology	92.9
53	Lymphoma	92.9
54	Polycythaemia	85.7
55	Myelofibrosis	71.4
56	Haemophilia	85.7
57	Principles of Infectious Disease	92.9
58	Human Immunodeficiency Virus Infection	100
59	Immunisation/ Vaccination in Adults	85.7
60	Upper respiratory tract infections	100
61	Lower respiratory tract infections	100
62	Lower urinary tract infections	100
63	Acute pyelonephritis	100
64	Septicaemia	92.9
65	Acute and chronic meningitis	100
66	Acute non-specific viremia	85.7
67	Influenza	92.9
68	Colds	92.9
69	Herpes simplex virus	100
70	Herpes varicella- zoster	100
71	Ebstein-Barr virus	85.7
72	Cellulitis	100
73	Thrombophlebitis	100
74	Pulmonary tuberculosis	100
75	Extrapulmonary tuberculosis	100
76	Malaria	100
77	Measles, mumps and rubella	100
78	Typhoid	92.9
79	Amoebiasis	92.9
80	Pyrexia of unknown origin	100
81	Characteristics of autoimmune and connective tissue disease	92.9
82	Gout	92.9
83	Approach to joint pain	100
84	Inflammatory arthritis	92.9
85	Osteoarthritis	92.9
86	Neck and back pain	85.7
87	Septic arthritis	92.9
88	Asthma	100
89	Chronic obstructive pulmonary disease	100
90	Approach to respiratory distress	100
91	Principles of pulmonology	100
92	Breathlessness	92.9
93	Cough	92.9
94	Pleural effusion	100
95	Cor pulmonale	92.9
96	SVC obstruction	92.9
97	Pneumonia	100
98	Lung abscess and empyema	92.9
99	Pulmonary tuberculosis	100
100	Respiratory failure	100
101	Fibrotic lung disease	92.9
102	Bronchiectasis	92.9
103	Bronchial carcinoma	92.9
104	Sarcoidosis	71.4
105	Mesothelioma	64.3
106	Occupational lung disease	78.6
107	Interstitial lung disease	85.7
108	HIV and the lungs	100
109	Acute kidney injury	100
110	Drugs and the kidney	100
111	Urinary tract infections	100
112	HIV and the Kidney	92.9
113	Chronic kidney disease	92.9
114	Hypertension and diabetes mellitus in kidney disease	92.9
115	Glomerular disease	92.9
116	Neurosyphilis	92.9
117	Neurocysticercosis	92.9
118	CNS manifestations of HIV infection	100
119	Stroke	100
120	Epilepsy	100
121	Headache	100
122	Paraparesis	100
123	Cerebellar disease	92.9
124	Essential skills in neurology	100
125	Peripheral neuropathy	100
126	Coma	100
127	Parkinson's Disease	85.7
128	Raised Intracranial Pressure	100
129	Lower Motor Neurone Weakness	85.7
130	Nerve Entrapment Syndromes	71.4
131	Muscular Weakness	92.9
132	Cerebral Toxoplasmosis	85.7
133	Wernicke's Encephalopathy	92.9
134	Subarachnoid Haemorrhage	100
135	Guillaine - Barre Syndrome	85.7
136	Rabies	92.9
137	Poliomyelitis	71.4
138	Motor Neurone Disease	71.4
139	Movement Disorders	78.6
140	Venous ThromboEmbolic disease, DVT	100
141	Pulmonary embolism	100
142	Drugs and the kidney	100
143	Soft-tissue infections	100
	Obstetrics and Gynaecology
1	Vaginal discharge syndrome	100
2	Contraception	100
3	Sexually transmitted diseases	100
4	Carcinoma of cervix	100
5	Post-menopausal bleeding	100
6	Pelvic Inflammatory Disease	100
7	Dysmenorrhoea	100
8	Premenstrual Dysphoric Disorder	71.4
9	Miscarriage/abortion	100
10	Ectopic Pregnancy	100
11	Dyspareunia	92.9
12	Pelvic Mass	100
13	Gestational Trophoblastic Disease	92.9
14	Carcinoma of the Vulva	92.9
15	Chronic Pelvic Pain	100
16	Endometrial Carcinoma	92.9
17	Hirsutism	85.7
18	Carcinoma of the ovaries	92.9
19	Ovarian Cyst	100
20	Menopause	100
21	Uterovaginal Prolapse	85.7
22	Uterine myomas	85.7
23	Bartholin's gland cyst and abscess	92.9
24	Menstrual Disorders	100
25	Pre-malignant Disorders of the Cervix	100
26	Infertility	92.9
27	Endometriosis	100
28	Amenorrhoea	92.9
29	Recurrent pregnancy loss	92.9
30	Abnormal uterine bleeding	100
31	Pubertal development	78.6
32	Polycystic Ovarian Syndrome	92.9
33	Urinary Incontinence	100
34	Carcinoma of the vagina	78.6
35	Congenital Anomalies of the Female Urogenital System	78.6
36	Non-neoplastic Disorders of the Vulva	71.4
37	Attending a woman in labour	100
38	Prolonged labour	100
39	Cervicitis	71.4
40	Cord presentation /cord prolapse	100
41	Shoulder dystocia	100
42	Hyperemesis gravidarum	100
43	Intra-uterine death	100
44	Antenatal Care	100
45	Fetal distress	100
46	Induction of labour	100
47	Normal labour and partogram	100
48	Normal puerperium	100
49	Infection in pregnancy	100
50	Antepartum haemorrhage	100
51	Postpartum haemorrhage	100
52	Premature rupture of membranes	100
53	Anaemia of pregnancy	100
54	Vaginal birth after caesarean section	92.9
55	Mastitis	100
56	Breech presentation	100
57	Breasts: inspection, lactation	100
58	Multiple pregnancies	85.7
59	Maternal mortality	100
60	Rupture of uterus	100
61	Premature labour	100
62	Chorio-amnionitis	92.9
63	Puerperal sepsis	92.9
64	Thromboembolism in obstetrics	100
65	Pregnancy-induced hypertension	100
66	Malrotation and malpresentation (excluding breech)	92.9
67	Pyrexia in pregnancy	92.9
68	Postpartum collapse	100
69	Uterine inversion	78.6
70	Cardiac disease in pregnancy	85.7
71	Diabetes in pregnancy	85.7
72	Disproportionate fetal growth	100
73	Analgesia and anaesthesia in pregnancy	100
74	Selection of high-risk pregnancy for hospitalisation or clinical care	100
75	Retained placenta	100
76	Hypertension in pregnancy	100
77	Intra-uterine growth restriction	85.7
78	Trauma of the lower genital tract	100
79	Pain relief in labour	100
80	Long Acting Reversible Contraception	78.6
81	Polyhydramnios/Oligohydramnios	78.6
82	Management of an episiotomy
	Skills
1	Perform an appropriate clinical examination in a child, adult or pregnant woman	100
2	Elicit and interpret all clinical signs	100
3	Formulate a reasonable diagnosis and establish an appropriate differential diagnosis	100
4	Use and interpret laboratory investigations rationally	100
5	Order and interpret commonly used X-rays	100
6	Institute management of common conditions and medical emergencies	100
7	Preoperative assessment of a patient and presentations to a senior	100
8	Demonstrate inhaler and spacer technique	100
9	Assess visual acuity using Snellen's chart	92.9
10	Perform a well-newborn check	100
11	Perform a mini-mental state examination	100
12	Measure Glasgow Coma Scale	100
13	Monitor patient during anaesthetic	100
14	Assess adequacy of the airway	100
15	Make a preoperative assessment of a patient	92.9
16	Monitor patient in recovery room	100
17	Obtain airway control using a mask	100
18	Administer oxygen	100
19	Reverse muscle relaxation	100
20	Check anaesthetic equipment	92.9
21	Perform a ring block	100
22	Perform inhalation induction	92.9
23	Perform penile block	78.6
24	Set airflows - McGill, circle, T-piece	100
25	Sterilise equipment	71.4
26	Ventilate using anaesthetic machine	92.9
27	Manage perioperative hypotension, hypoxia and dysrhythmias	92.9
28	Perform intravenous induction	100
29	Administer ketamine sedation	100
30	Use a laryngeal mask for airway management	100
31	Administer conscious sedation	100
32	Administer a spinal anaesthetic	92.9
33	Administer a general anaesthetic	92.9
34	Perform direct laryngoscopy and Intubate the trachea	100
35	Perform rapid sequence induction of anaesthesia	92.9
36	Perform fine needle aspiration of a lymph node	100
37	Take a nasal and throat swab	100
38	Measure peak expiratory flow rate	92.9
39	Record a 12-channel ECG	100
40	Collect a pus swab	100
41	Collect a venous blood sample	100
42	Collect an arterial blood sample	100
43	Measure blood glucose with a glucometer	100
44	Measure haemoglobin with a haemoglobin meter	100
45	Obtain a capillary blood sample from the heel or finger	100
46	Perform a blood culture	100
47	Perform a conjunctival swab	92.9
48	Perform a Mantoux or tine test	100
49	Perform a Papanicolaou smear	85.7
50	Obtain a clean-catch urine specimen	100
51	Perform abdominal paracentesis	85.7
52	Perform a lumbar puncture	92.86
53	Perform proctoscopy	78.6
54	Perform a lumbar puncture - child	85.7
55	Collect a femoral vein blood sample	100
56	Perform a skin biopsy - punch or elliptical	92.9
57	Perform induced-sputum collection	100
58	Perform fine-needle aspiration biopsy of other soft tissue mass	92.9
59	Take a urethral swab	92.9
60	Perform fine-needle aspiration biopsy of a breast lump	85.7
61	Perform endometrial biopsy	85.7
62	Estimate the gestational age of a newborn	92.9
63	Assess mental status	100
64	Calculate the percentage burn in a burn patient	100
65	Perform primary and secondary surveys of a trauma patient	100
66	Assess fetal movement and wellbeing	92.9
67	Perform a paediatric growth assessment and plot on a growth chart	100
68	Assess a diabetic foot	100
69	Assess fetal well-being in labour	100
70	Rapid triage of the child presenting with acute conditions in casualty/outpatients	100
71	Perform a developmental assessment in a child	100
72	Perform a risk assessment for suicide or potential harm to others	100
73	Assess a child for sexual or other abuse	100
74	Assess progress of labour using a partogram	92.9
75	Carry out a cardiotocographic assessment	100
76	Perform vaginal speculum examination in pregnancy and labour	100
77	Interpret a partogram	92.9
78	Perform and suture an episiotomy	100
79	Perform manual removal of placenta	92.9
80	Perform a normal vaginal delivery	100
81	Perform a vaginal breech delivery	85.7
82	Perform an assisted vaginal delivery	78.6
83	Repair a third-degree vaginal tear	57.14
84	Apply a splint	100
85	Immobilise the spine	100
86	Apply a plaster backslab	100
87	Apply finger and hand splints	92.9
88	Set up skin traction	85.7
89	Reduce a dislocated shoulder	100
90	Reduce a dislocated temporomandibular joint	92.9
91	Set up skeletal traction	78.6
92	Reduce a closed fracture of the hand or forearm	100
93	Perform cardiopulmonary resuscitation - adult	100
94	Intubate and ventilate patient	85.7
95	Remove a foreign body from the oropharynx	92.9
96	Prescribe and administer intravenous fluid therapy	100
97	Administer a blood transfusion	100
98	Manage the airway	100
99	Perform bag-and-mask ventilation	100
100	Perform cardiopulmonary resuscitation - child	100
101	Relieve a tension pneumothorax	100
102	Insert a central venous line	78.6
103	Perform cricothyroidotomy	71.4
104	Set up external electrical cardiac pacing	71.4
105	Perform synchronised cardioversion	92.9
106	Clean and dress a wound	100
107	Close or suture a wound	100
108	Obtain pressure control of haemorrhage	85.7
109	Suture lacerations	100
110	Suture the pinna or ear lobe	85.7
111	Remove an embedded splinter or fish hook	100
112	Reduce a paraphimosis	100
113	Perform evacuation of the uterus	78.6
114	Perform dilation and curettage of the uterus	78.6
115	Drain a subungual haematoma	92.9
116	Incise and drain a perianal haematoma	71.4
117	Incise and drain an abscess	100
118	Debride a wound	100
119	Drain a Bartholin's cyst or abscess	85.7
120	Excise lumps and such as a sebaceous cyst	100
121	Drain a hydrocoele	85.7
122	Suture an eyelid	71.4
123	Perform venous cut-down	50
124	Perform tubal ligation	71.4
125	Perform a circumcision	85.7
126	Perform lymph node excision biopsy	85.7
127	Incise and drain a Meibomian cyst	71.4
128	Administer inhaled medication using aerosol and spacer	100
129	Administer a nebuliser	100
130	Set up intravenous infusion	100
131	Catheterise the bladder	100
132	Perform a dry mopping of the ear	92.9
133	Instill eye drops or apply ointment	92.9
134	Administer subcutaneous injection	100
135	Use a metered dose inhaler	92.9
136	Administer intramuscular injection	100
137	Administer intravenous injection	100
138	Perform cryotherapy /cauterisation	78.6
139	Perform eye washout for chemical burns	100
140	Perform gastric lavage	78.6
141	Perform pleural paracentesis	92.9
142	Prepare a critically ill patient for transport	100
143	Remove a foreign body from the ear, eye, nose	100
144	Insert and remove an intercostal drain	100
145	Set up an incubator	92.9
146	Set up intra-osseous infusion	78.6
147	Syringe the ear	100
148	Insert a suprapubic bladder catheter	92.9
149	Set up phototherapy for jaundiced baby	92.9
150	Insert a stomach tube - neonate /child	100
151	Administer rabies prophylaxis	92.9
152	Apply a compression dressing to a venous ulcer	92.9
153	Cannulate the umbilical vein	92.9
154	Canulate a scalp vein	92.9
155	Drain a stye	78.6
156	Insert a nasogastric tube	100
157	Insert a urinary catheter - child /neonate/adult	100
158	Pack nose and cauterise for epistaxis	100
159	Insert an intrauterine contraceptive device	92.9
160	Perform umbilical vein catheterisation	92.9
161	Insert a balloon into the uterus for haemostasis.	85.7
162	Aspirate and inject a knee joint.	92.9
163	Perform venesection	85.7
164	Insert an intercostal drain - child /neonate.	71.4
165	Set up a syringe driver.	85.7
166	Ultrasound training, e.g. eFAST or POCUS	75
167	Basic surgical skills	100
168	Apply a below-knee or below-elbow cast	100

## Sheet: Supp Table 3 Non HCP content
	Non Healthcare practitioner roles
	Roles and Content	Consensus achieved
	Communicator
1	Taking a psychiatric history	100.00
2	Psychoeducation	85.70
3	Palliative Care	85.70
4	Counselling: HIV child and parent, getting consent	92.90
5	Bereavement	57.10
6	Take an appropriate history of a child, adult, and pregnant woman.	92.90
7	Demonstrate effective communication skills.	92.90
8	Provide counselling: HIV pre- and post-test	100.00
9	Share a consultation with a PHC nurse.	78.60
10	Provide counselling: sexual assault.	92.90
11	Provide counselling: death and dying.	92.90
12	Provide counselling: break bad news.	92.90
13	Motivate behaviour change	85.70
14	Conduct a family conference.	78.60
15	Assess and counsel families and couples.	78.60
16	Interview a caregiver	92.90
17	Trauma debrief - discussion post-resuscitation	87.50
18	An introduction to psychotherapy	76.50
	Leader and manager
1	Understand and apply the Mental Health Care Act 17 of 2002	92.90
2	Private practice management	71.40
3	Participate in a quality improvement project.	78.60
4	The district health system	92.90
5	Implement principles of chronic care.	100.00
6	Forensic Medicine - Basics	71.40
7	Develop and use flowcharts for chronic care.	85.70
8	Set up and supervise kangaroo mother care.	85.70
9	Complete an ICD-10 coding form.	71.40
10	Adverse incidents in healthcare	78.60
11	Management of self	88.20
12	Role model	70.60
13	Learning styles and teamwork	82.40
14	Clinical Audit	82.40
15	Perinatal morbidity and mortality	100.00
	Scholar
1	Undertaking a critical appraisal of records	85.70
2	Use of learning portfolios	78.60
3	Reflect on one's own strengths and weaknesses and develop an appropriate learning plan.	92.90
	Collaborator
1	The role of the psychologist in the assessment and management of psychiatric disorders	71.40
2	The role of the social worker in the assessment and management of psychiatric disorders	71.40
3	Referral to another mental health care practitioner	92.90
4	Interprofessional learning	71.40
5	Multidisciplinary teamwork and genograms	92.90
6	Work with the multidisciplinary team (MDT)	100.00
7	Write a referral letter to a member of the MDT.	100.00
8	Share a consultation with a PHC nurse.	78.60
9	The role of the occupational therapist in the assessment and management of psychiatric disorders	76.50
10	Social and vocational rehabilitation	77.8
	Health advocate
1	Advocacy and Support Groups	71.40
2	Support Systems for Depressive Disorders	71.40
3	Capacity for informed consent	100.00
4	Child Abuse and J88	100.00
5	Non Accidental Injury	100.00
6	Context in Family Medicine	78.60
7	Care plan in palliative care	71.40
8	Home visits - palliative care	71.40
9	Community engagement	71.40
10	Cultural factors and their role in patient management	78.60
11	Use of a problem-oriented medical record	92.90
12	Rapid triage of the child presenting with acute conditions in casualty/outpatients	100.00
13	Examine and document a victim of sexual assault and collect appropriate samples.	85.70
14	Examine an assault victim and complete a J88 form.	92.90
15	Homelessness	78.90
	Professional
1	Transfer to a psychiatric hospital.	92.90
2	Write a referral letter.	100.00
3	Ethics in Clinical Practice	100.00
4	Write a referral letter to a member of the MDT.	100.00
5	Write a discharge summary.	100.00
6	Write comprehensive clinical notes for inpatients and outpatients.	100.00
7	Write a prescription	100.00
8	Complete a disability grant form	100.00

## Sheet: Supp Table 4 Excluded content
	Item that did not reach consensus after two rounds of Delphi
	Discipline	Content	% Consensus achieved
1	Skills	Perform a caesarean section.	62.5
2	Skills	Repair a third-degree vaginal tear.	43.8
3	Skills	Perform venous cut-down	37.5
4	Skills	Perform appendicectomy	43.8
5	Skills	Excise a breast fibro-adenoma	43.8
6	Skills	Inject tennis elbow /golfer's elbow.	37.5
7	Skills	Operative deliveries- ventouse and vacuum	62.5
8	Skills	Postmortem	50
9	Internal Medicine	Mesothelioma	50
10	Internal Medicine	Muscular Dystrophy	68.8
11	Internal Medicine	Multiple Sclerosis	56.3
12	Surgical disciplines	Head and Neck Trauma - Maxillofacial injury	66.7
13	Surgical disciplines	Video Otoscopy	43.8
14	Integrated primary care	Reflective journaling	62.5
15	Integrated primary care	PHC Re-engineering	56.3
16	Child Health	Care of children with advanced neurological conditions	56.3
17	Child Health	Care of children with advanced gastrointestinal conditions	56.3
18	Child Health	Care of children with advanced pulmonological conditions	62.5
19	Child Health	Care of children with advanced renal conditions	56.3
20	Child Health	Care of children with advanced neonatal conditions	50
21	Child Health	Care of children with advanced cardiovascular conditions	62.5
22	Child Health	Care of children with advanced haematological conditions	50
23	Child Health	Care of children with advanced palliative care needs	68.8
24	Child Health	Genetics	68.8
25	Mental Health	Disorders other than schizophrenia in the schizophrenia spectrum and related disorders	62.5
26	Mental Health	Specific Phobias	56.3
27	Mental Health	Elimination Disorders	43.8
